# Supplementary material for: Identification of the miRNA signature associated with survival in patients with ovarian cancer
Source: PubMed Central journal article supplement (PMC8148489; doi:10.18632/aging.202940), 2021-04-27
Supplement: aging-13-202940-s001.pdf [file aging-13-202940-s001.pdf]

## SUPPLEMENTARY FIGURES

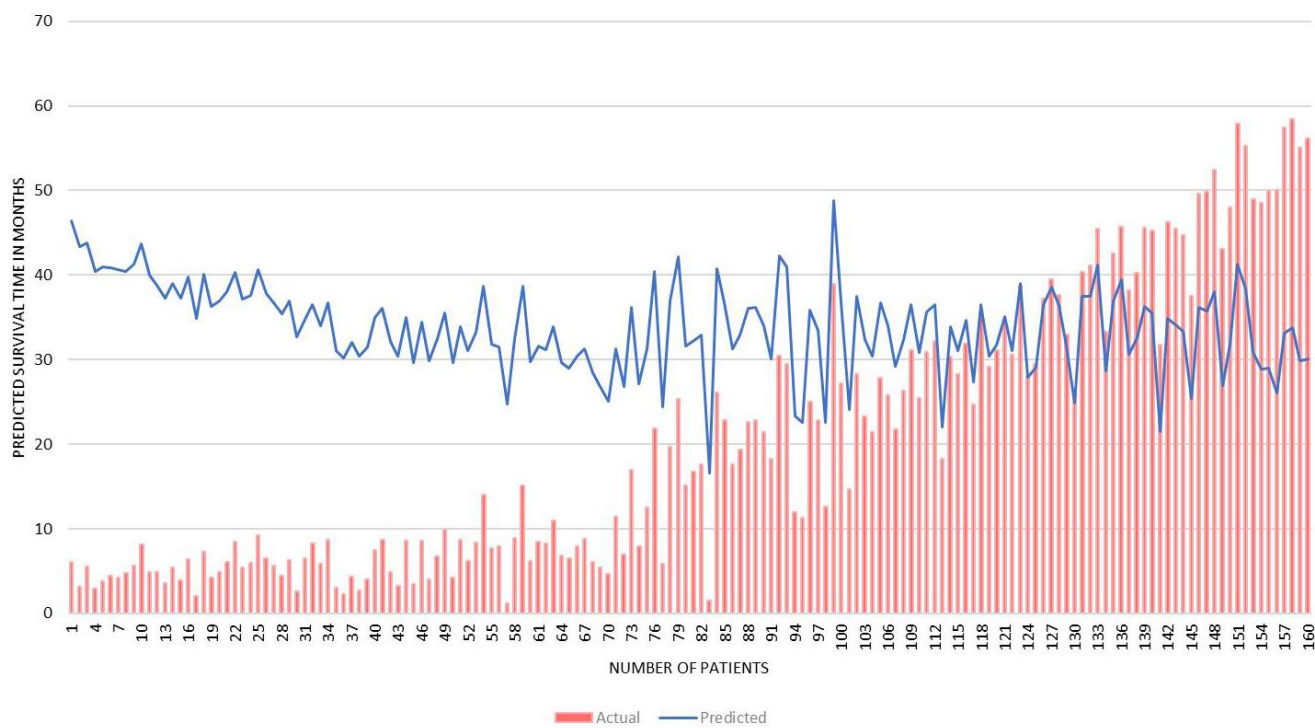

**Supplementary Figure 1. The validation of OV-SURV on an independent cohort of 160 living patients with ovarian cancer. Predicted survival time is longer than the follow-up time for the first 123 patients (1–123).**

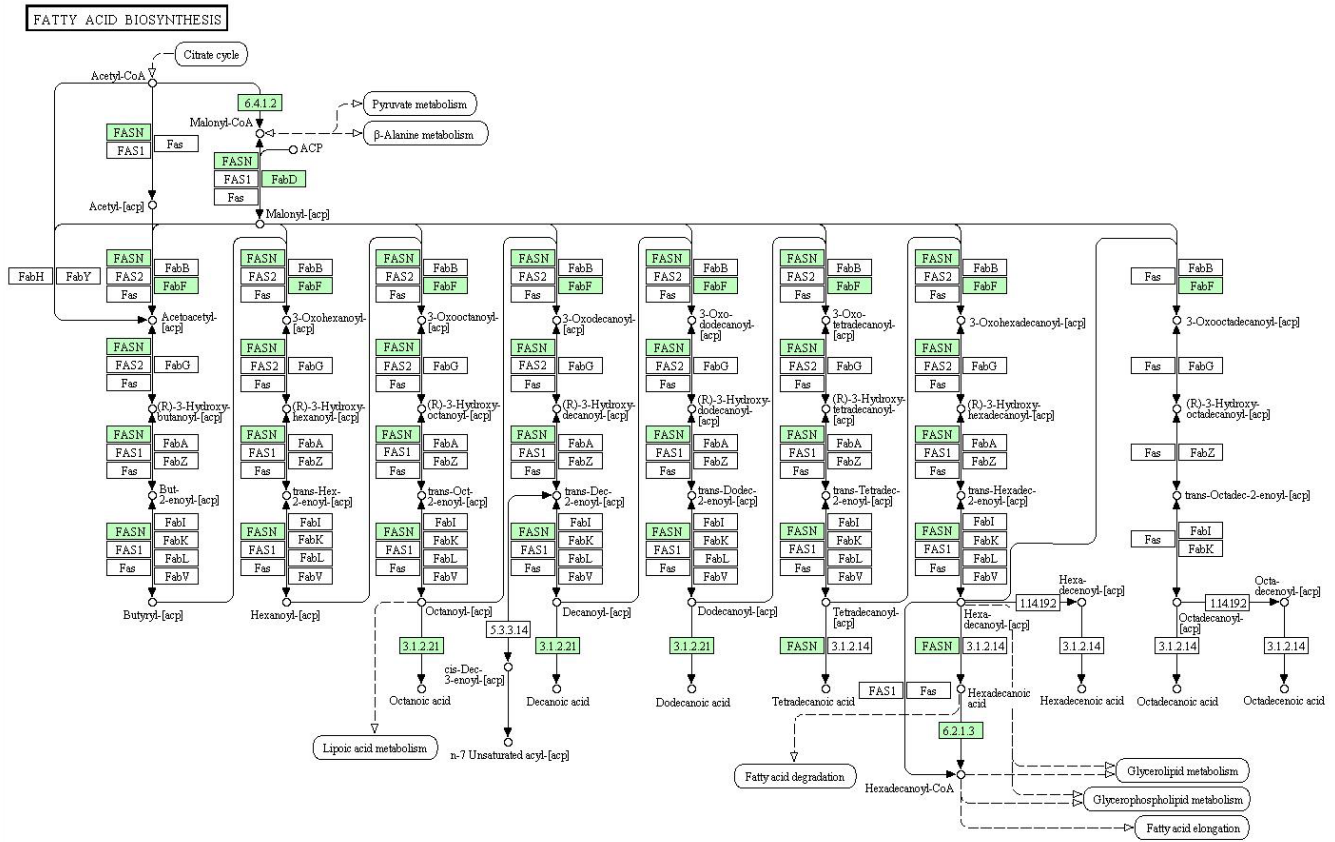

**Supplementary Figure 2. Fatty acid biosynthesis flow diagram.** Obtained from the KEGG pathway database.

FATTY ACID METABOLISM

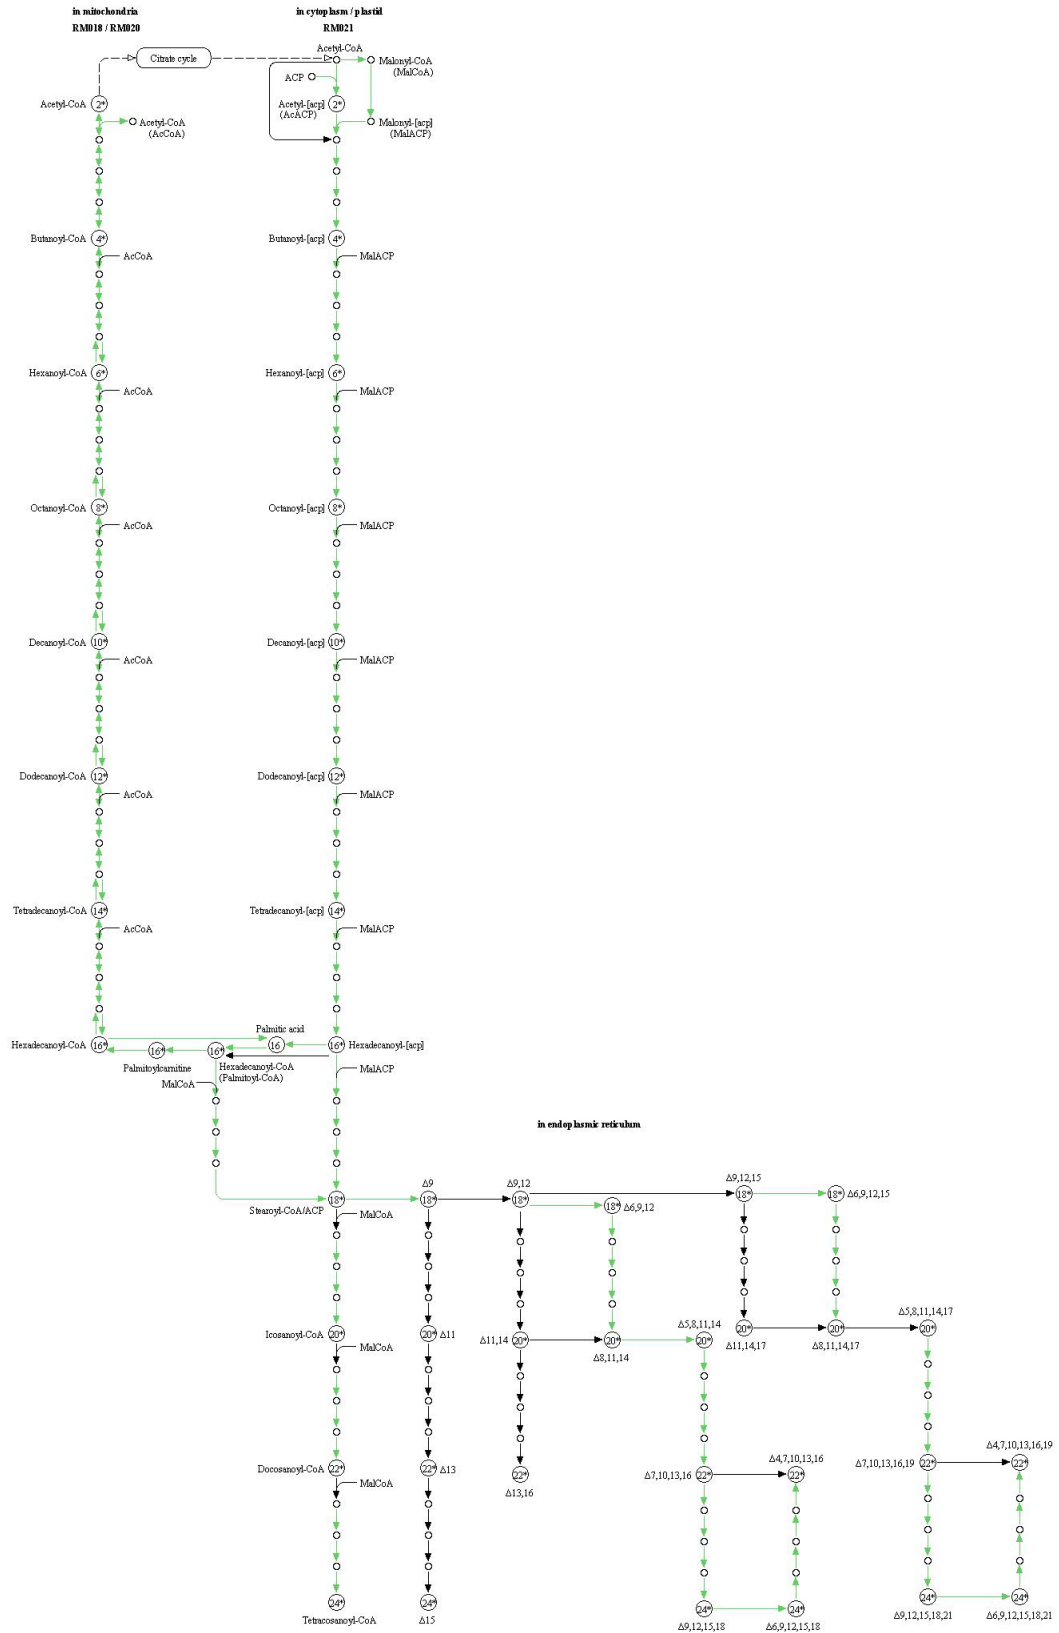

01212 94814  
© Kazuhisa Laboratories

Supplementary Figure 3. Fatty acid metabolism flow diagram. Obtained from the KEGG pathway database.

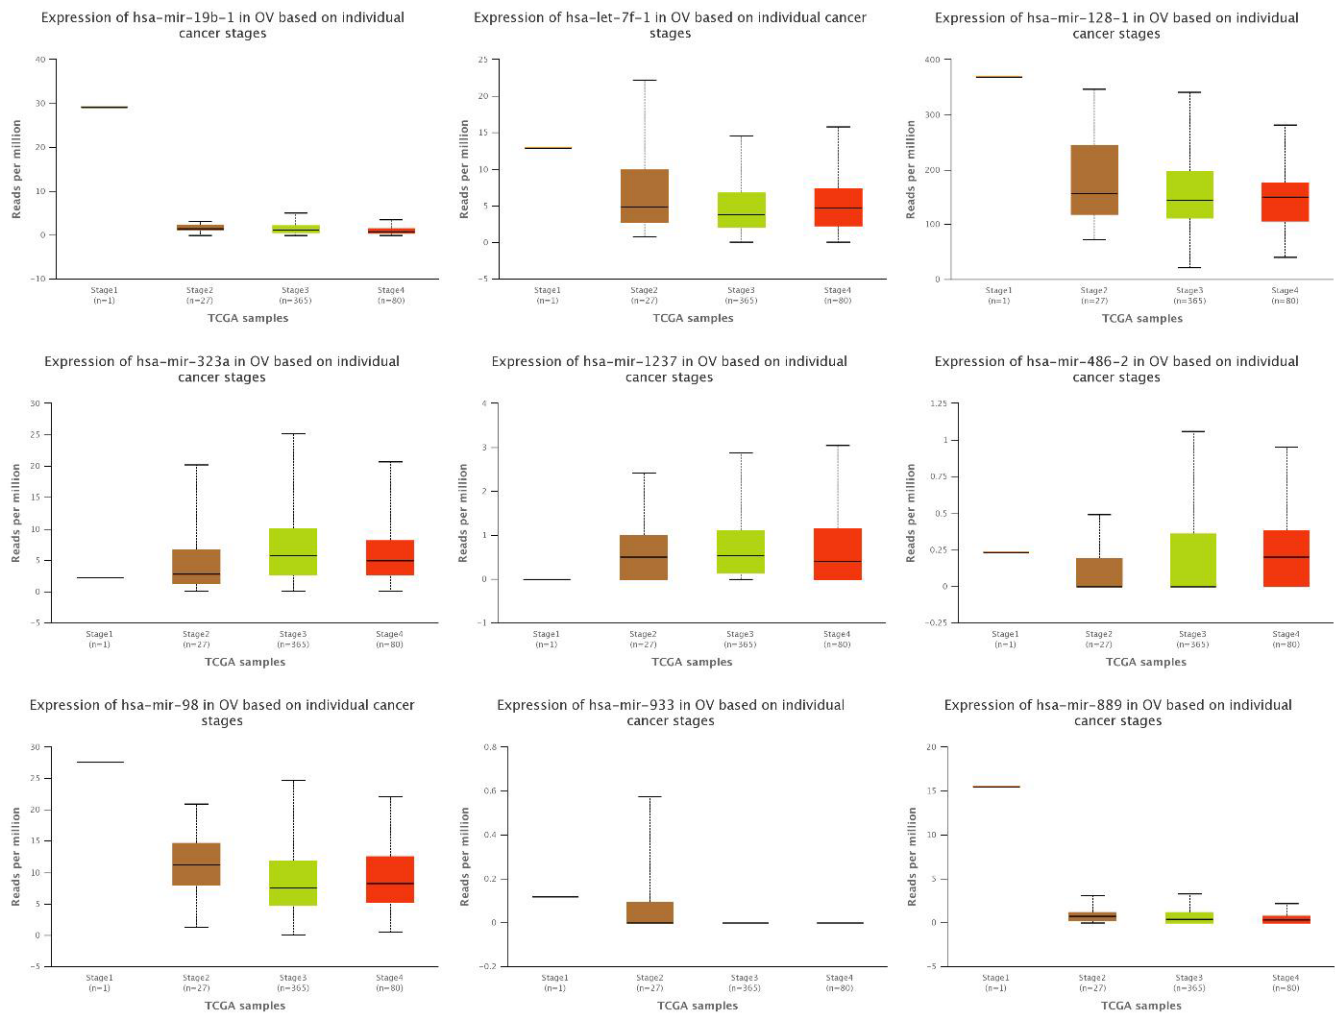

**Supplementary Figure 4. Box plot showing relative expression of top ranked miRNAs across stages of patients with ovarian cancer.**

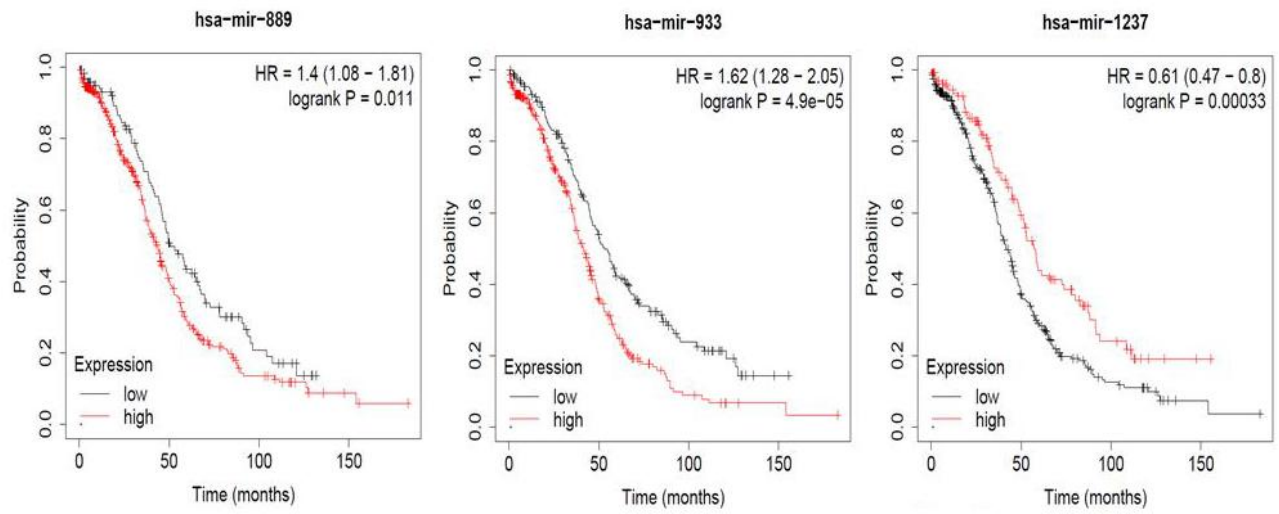

**Supplementary Figure 5. Kaplan–Meier plots of hsa-miR-889, hsa-miR-933, and hsa-miR-1237 for the high-expression and low-expression groups of the ovarian cancer cohort.**

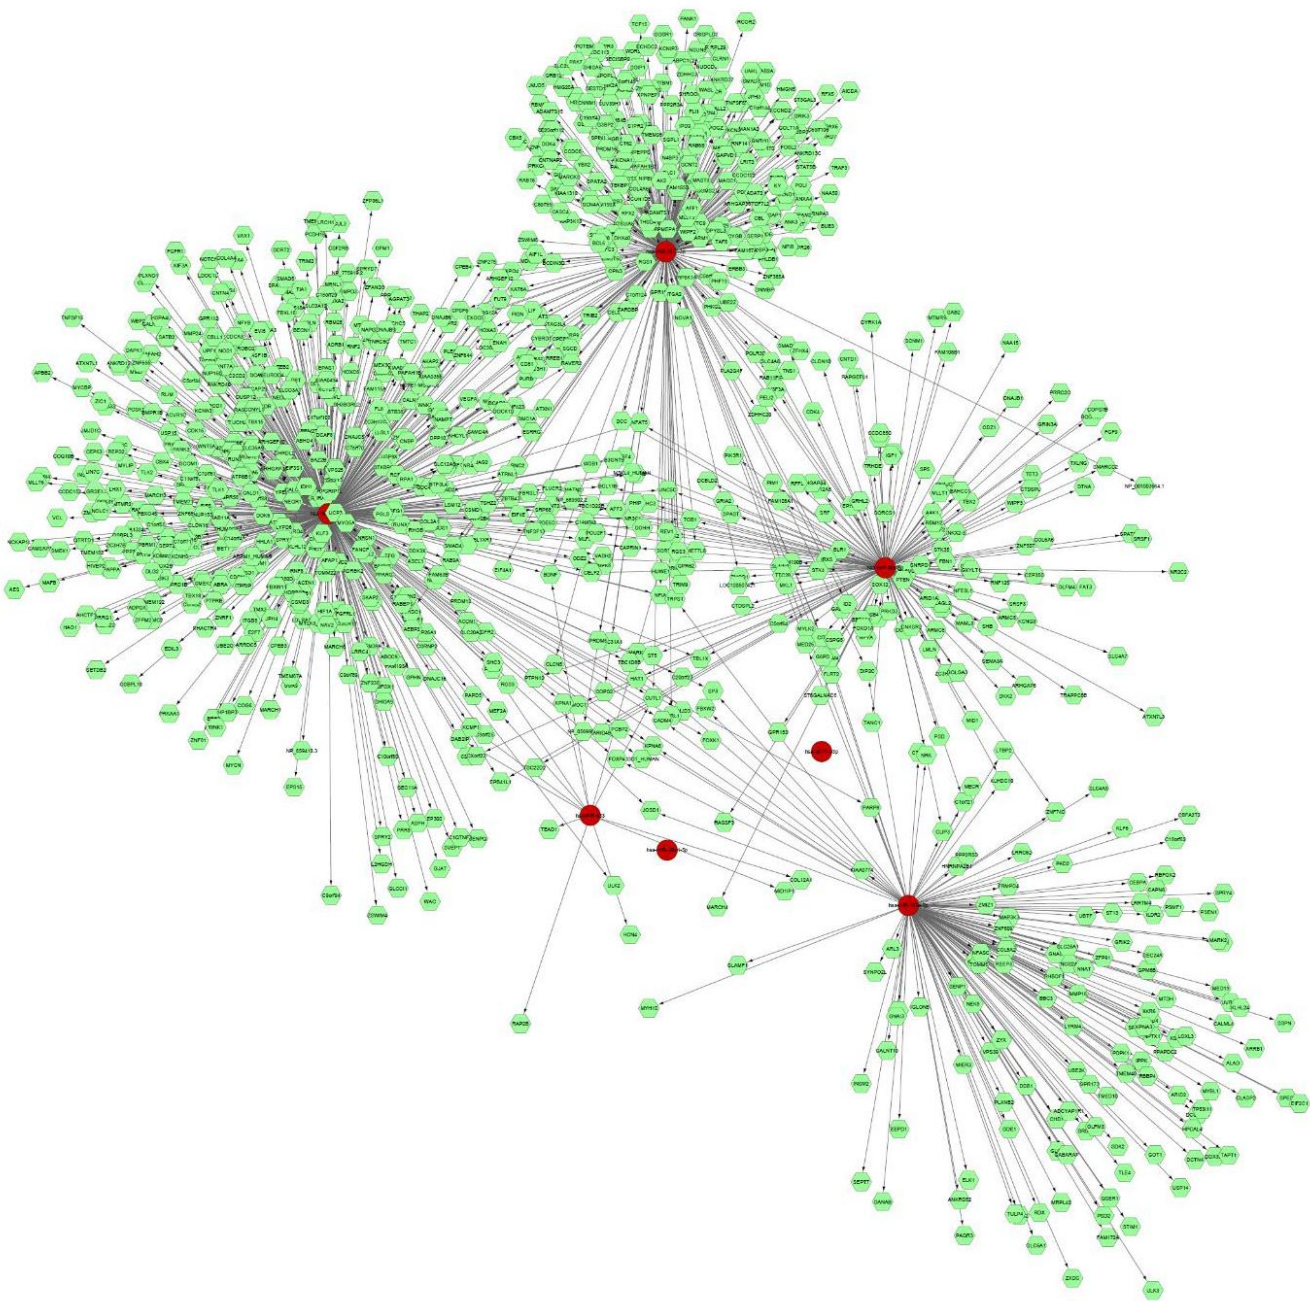

**Supplementary Figure 6. miRNA-gene target network.** miRNAs are shown in red colored circles; edges represent target genes in green colored hexagons. There are 1116 predicted interactions in the network using TargetScan.
