# Supplementary material for: Identification of the miRNA signature associated with survival in patients with ovarian cancer
Source: publisher site journal article supplement (doi:10.18632/aging.202940), 2021-04-27
Supplement: Supplementary file [file aging-v13i9-202940-supplementary-material-SD2.pdf]

## SUPPLEMENTARY TABLES

**Supplementary Table 1. Top 10 ranked miRNAs involved in KEGG pathways.**

| KEGG pathway                                             | No. of genes | no. of miRNAs | p-value   |
|----------------------------------------------------------|--------------|---------------|-----------|
| TGF-beta signaling pathway                               | 16           | 5             | 3.289E-06 |
| Proteoglycans in cancer                                  | 26           | 4             | 7.935E-05 |
| Sphingolipid metabolism                                  | 10           | 3             | 0.0001055 |
| Hippo signaling pathway                                  | 24           | 4             | 0.0005239 |
| Adherens junction                                        | 13           | 5             | 0.0094746 |
| Signaling pathways regulating pluripotency of stem cells | 21           | 5             | 0.0106464 |
| Lysine degradation                                       | 7            | 3             | 0.0191976 |
| Cell cycle                                               | 18           | 5             | 0.0261571 |
| Endocytosis                                              | 24           | 5             | 0.0261571 |
| Regulation of actin cytoskeleton                         | 26           | 5             | 0.0261571 |
| ECM-receptor interaction                                 | 11           | 5             | 0.0315672 |
| Glioma                                                   | 11           | 4             | 0.0419673 |
| FoxO signaling pathway                                   | 20           | 4             | 0.0498515 |

**Supplementary Table 2. KEGG pathway analysis of the miRNA signature.**

| KEGG pathway                                             | Genes | miRNAs | p-value   |
|----------------------------------------------------------|-------|--------|-----------|
| TGF-beta signaling pathway                               | 57    | 26     | 2.553E-11 |
| Axon guidance                                            | 76    | 26     | 5.697E-07 |
| Hippo signaling pathway                                  | 87    | 27     | 8.597E-07 |
| Renal cell carcinoma                                     | 46    | 26     | 1.388E-06 |
| Signaling pathways regulating pluripotency of stem cells | 87    | 30     | 2.115E-06 |
| Adherens junction                                        | 46    | 20     | 4.679E-06 |
| Proteoglycans in cancer                                  | 108   | 31     | 5.515E-06 |
| Fatty acid metabolism                                    | 22    | 18     | 1.541E-05 |
| Prion diseases                                           | 14    | 17     | 2.916E-05 |
| Arrhythmogenic right ventricular cardiomyopathy (ARVC)   | 43    | 24     | 6.834E-05 |
| Thyroid hormone signaling pathway                        | 66    | 27     | 0.0004487 |
| Pathways in cancer                                       | 212   | 35     | 0.0004487 |
| Rap1 signaling pathway                                   | 113   | 30     | 0.0007618 |
| Estrogen signaling pathway                               | 54    | 26     | 0.0013402 |
| Fatty acid biosynthesis                                  | 5     | 8      | 0.0017506 |
| Lysine degradation                                       | 27    | 27     | 0.0019085 |
| Glutamatergic synapse                                    | 62    | 31     | 0.0031419 |
| Bacterial invasion of epithelial cells                   | 45    | 28     | 0.0034732 |
| FoxO signaling pathway                                   | 74    | 32     | 0.0053876 |
| Circadian rhythm                                         | 23    | 27     | 0.0058225 |
| Transcriptional misregulation in cancer                  | 93    | 32     | 0.0058225 |
| Focal adhesion                                           | 110   | 32     | 0.0073101 |
| Dorso-ventral axis formation                             | 20    | 18     | 0.0075923 |
| Mucin type O-Glycan biosynthesis                         | 16    | 15     | 0.0090565 |
| Endocytosis                                              | 110   | 30     | 0.0093516 |

|                                             |     |    |           |
|---------------------------------------------|-----|----|-----------|
| Oxytocin signaling pathway                  | 83  | 31 | 0.0125495 |
| Prostate cancer                             | 51  | 31 | 0.0144126 |
| Fatty acid degradation                      | 20  | 15 | 0.0146739 |
| Wnt signaling pathway                       | 72  | 30 | 0.0146739 |
| Platelet activation                         | 71  | 30 | 0.0148846 |
| Shigellosis                                 | 38  | 20 | 0.0162063 |
| mRNA surveillance pathway                   | 50  | 23 | 0.0162063 |
| Thyroid hormone synthesis                   | 36  | 26 | 0.0162063 |
| Cell cycle                                  | 64  | 27 | 0.0162063 |
| Neurotrophin signaling pathway              | 65  | 31 | 0.0162063 |
| cGMP-PKG signaling pathway                  | 86  | 34 | 0.0162063 |
| Morphine addiction                          | 44  | 26 | 0.0188883 |
| Ubiquitin mediated proteolysis              | 70  | 28 | 0.0253401 |
| Adrenergic signaling in cardiomyocytes      | 74  | 30 | 0.026999  |
| Chronic myeloid leukemia                    | 41  | 25 | 0.0277362 |
| Regulation of actin cytoskeleton            | 108 | 31 | 0.0277362 |
| Vasopressin-regulated water reabsorption    | 26  | 24 | 0.028921  |
| T cell receptor signaling pathway           | 56  | 24 | 0.0352566 |
| Glioma                                      | 35  | 28 | 0.0352566 |
| Phosphatidylinositol signaling system       | 43  | 29 | 0.0352566 |
| Protein processing in endoplasmic reticulum | 83  | 32 | 0.0354841 |
| Prolactin signaling pathway                 | 39  | 24 | 0.0360174 |
| GABAergic synapse                           | 42  | 27 | 0.0360174 |
| PI3K-Akt signaling pathway                  | 167 | 35 | 0.0360174 |
| RNA transport                               | 85  | 31 | 0.0375067 |
| Pancreatic cancer                           | 37  | 27 | 0.041276  |
| Melanoma                                    | 40  | 29 | 0.0430789 |
| cAMP signaling pathway                      | 100 | 34 | 0.0455181 |
| Choline metabolism in cancer                | 55  | 28 | 0.0488212 |

**Supplementary Table 3. GO analysis of top 10 ranked miRNAs involved in biological process, cellular components and molecular functions (p<0.05).**

|                     | <b>GO category</b>                                   | <b>miRNAs</b> | <b>Genes</b> | <b>p-value</b> |
|---------------------|------------------------------------------------------|---------------|--------------|----------------|
|                     | gene expression                                      | 3             | 82           | 1e-325         |
|                     | biosynthetic process                                 | 4             | 360          | 1e-325         |
|                     | cellular nitrogen compound metabolic process         | 4             | 419          | 1e-325         |
|                     | symbiosis, encompassing mutualism through parasitism | 3             | 68           | 2.787E-14      |
|                     | viral process                                        | 3             | 62           | 3.15E-13       |
|                     | cellular protein modification process                | 4             | 209          | 8.606E-13      |
|                     | transcription, DNA-templated                         | 2             | 170          | 3.92E-06       |
|                     | catabolic process                                    | 2             | 131          | 1.38E-05       |
|                     | response to stress                                   | 2             | 129          | 0.0002111      |
|                     | nucleobase-containing compound catabolic process     | 2             | 71           | 0.0003728      |
|                     | membrane organization                                | 3             | 55           | 0.0005988      |
| Biological process  | small molecule metabolic process                     | 2             | 138          | 0.0008035      |
|                     | mitotic cell cycle                                   | 1             | 27           | 0.0017244      |
|                     | cell death                                           | 2             | 62           | 0.0026435      |
|                     | Fc-epsilon receptor signaling pathway                | 3             | 23           | 0.0033008      |
|                     | neurotrophin TRK receptor signaling pathway          | 4             | 32           | 0.0034551      |
|                     | mRNA metabolic process                               | 2             | 23           | 0.0045806      |
|                     | cellular component assembly                          | 1             | 64           | 0.0061575      |
|                     | DNA metabolic process                                | 1             | 47           | 0.0103647      |
|                     | macromolecular complex assembly                      | 1             | 47           | 0.0109222      |
|                     | viral life cycle                                     | 2             | 16           | 0.0129594      |
|                     | RNA metabolic process                                | 2             | 24           | 0.023756       |
|                     | cellular protein metabolic process                   | 2             | 31           | 0.0397643      |
|                     | organelle                                            | 5             | 834          | <1e-325        |
|                     | cytosol                                              | 4             | 248          | 4.462E-13      |
| Cellular components | protein complex                                      | 4             | 308          | 2.554E-11      |
|                     | nucleoplasm                                          | 3             | 118          | 9.938E-11      |
|                     | microtubule organizing center                        | 1             | 36           | 0.004196       |
|                     | ion binding                                          | 4             | 447          | <1e-325        |
|                     | RNA binding                                          | 4             | 192          | 2.22E-15       |
|                     | enzyme binding                                       | 3             | 109          | 2.094E-08      |
| Molecular functions | poly(A) RNA binding                                  | 2             | 124          | 1.168E-07      |
|                     | protein binding transcription factor activity        | 2             | 46           | 4.346E-05      |
|                     | nucleic acid binding transcription factor activity   | 2             | 63           | 0.0060971      |

**Supplementary Table 4. GO analysis of the miRNA signature.**

| <b>GO category</b>                                           | <b>Genes</b> | <b>miRNAs</b> | <b>p-value</b> |
|--------------------------------------------------------------|--------------|---------------|----------------|
| mRNA metabolic process                                       | 92           | 6             | 1.34E-19       |
| cellular protein metabolic process                           | 149          | 7             | 3.2E-19        |
| nucleic acid binding transcription factor activity           | 264          | 8             | 3.65E-19       |
| nucleobase-containing compound catabolic process             | 279          | 8             | 4.5E-19        |
| Fc-epsilon receptor signaling pathway                        | 69           | 8             | 7.6E-19        |
| cell death                                                   | 277          | 9             | 9.65E-19       |
| neurotrophin TRK receptor signaling pathway                  | 106          | 9             | 9.9E-19        |
| membrane organization                                        | 209          | 9             | 1.201E-18      |
| protein binding transcription factor activity                | 213          | 10            | 2.145E-18      |
| response to stress                                           | 609          | 10            | 3.456E-18      |
| macromolecular complex assembly                              | 282          | 10            | 4.53E-18       |
| mitotic cell cycle                                           | 188          | 11            | 5.63E-18       |
| catabolic process                                            | 607          | 11            | 7.6E-18        |
| cellular component assembly                                  | 399          | 11            | 9.34E-18       |
| small molecule metabolic process                             | 640          | 11            | 9.37E-18       |
| enzyme binding                                               | 477          | 13            | 1.276E-17      |
| symbiosis, encompassing mutualism through parasitism         | 264          | 13            | 2.1E-17        |
| nucleoplasm                                                  | 504          | 14            | 2.18E-17       |
| viral process                                                | 234          | 14            | 4.89E-17       |
| poly(A) RNA binding                                          | 522          | 14            | 4.89E-17       |
| biosynthetic process                                         | 1311         | 16            | 5.437E-17      |
| cytosol                                                      | 939          | 17            | 5.647E-17      |
| cellular protein modification process                        | 816          | 17            | 6.54E-17       |
| ion binding                                                  | 1717         | 17            | 6.71E-17       |
| protein complex                                              | 1226         | 17            | 8.6E-17        |
| RNA binding                                                  | 678          | 18            | 9.82E-17       |
| gene expression                                              | 332          | 19            | 7.5E-16        |
| cellular nitrogen compound metabolic process                 | 1647         | 21            | 9.6E-16        |
| organelle                                                    | 3270         | 23            | 1.8E-15        |
| RNA metabolic process                                        | 90           | 5             | 1.89E-15       |
| transcription, DNA-templated                                 | 555          | 6             | 2.29E-14       |
| protein complex assembly                                     | 189          | 4             | 5.08E-12       |
| DNA metabolic process                                        | 196          | 5             | 1.25E-11       |
| blood coagulation                                            | 118          | 6             | 1.31E-09       |
| cytoskeletal protein binding                                 | 178          | 5             | 2.25E-09       |
| G2/M transition of mitotic cell cycle                        | 53           | 4             | 4.28E-08       |
| epidermal growth factor receptor signaling pathway           | 55           | 3             | 6.24E-07       |
| transcription initiation from RNA polymerase II promoter     | 78           | 5             | 9.1E-07        |
| RNA splicing                                                 | 87           | 5             | 1.09E-06       |
| mRNA processing                                              | 121          | 4             | 4.43E-06       |
| microtubule organizing center                                | 107          | 3             | 5.08E-06       |
| enzyme regulator activity                                    | 154          | 3             | 0.0000402      |
| Fc-gamma receptor signaling pathway involved in phagocytosis | 24           | 3             | 0.0001053      |

|                                                                                                              |     |   |           |
|--------------------------------------------------------------------------------------------------------------|-----|---|-----------|
| positive regulation of protein insertion into mitochondrial membrane involved in apoptotic signaling pathway | 17  | 5 | 0.0001221 |
| immune system process                                                                                        | 214 | 2 | 0.0001239 |
| fibroblast growth factor receptor signaling pathway                                                          | 46  | 2 | 0.0001266 |
| cell cycle                                                                                                   | 163 | 2 | 0.0002052 |
| chromatin organization                                                                                       | 42  | 3 | 0.0017787 |
| intrinsic apoptotic signaling pathway                                                                        | 28  | 4 | 0.001842  |
| G1/S transition of mitotic cell cycle                                                                        | 53  | 3 | 0.002041  |
| transcription factor binding                                                                                 | 123 | 3 | 0.0030848 |
| nuclear-transcribed mRNA catabolic process, deadenylation-dependent decay                                    | 25  | 2 | 0.0036671 |
| mRNA splicing, via spliceosome                                                                               | 38  | 3 | 0.0059903 |
| vesicle-mediated transport                                                                                   | 159 | 2 | 0.0073256 |
| innate immune response                                                                                       | 128 | 4 | 0.0073332 |
| viral life cycle                                                                                             | 31  | 3 | 0.0161939 |
| cellular lipid metabolic process                                                                             | 41  | 3 | 0.022398  |
| positive regulation of transcription, DNA-templated                                                          | 131 | 1 | 0.0319244 |
| cellular component disassembly involved in execution phase of apoptosis                                      | 16  | 2 | 0.0431022 |

**Supplementary Table 5. Expression difference of top ranked miRNAs across stages of patients with ovarian cancers.**

| miRNA         | Comparison             | p-value      |
|---------------|------------------------|--------------|
| hsa-miR-19b-1 | Stage 1 vs Stage 2,3&4 | N/A          |
|               | Stage 2 vs Stage 3     | 1.635040E-01 |
|               | Stage 2 vs Stage 4     | 1.423760E-01 |
|               | Stage 3 vs Stage 4     | 6.580000E-01 |
| hsa-let-7f-1  | Stage 1 vs Stage 2,3&4 | N/A          |
|               | Stage 2 vs Stage 3     | 8.590100E-02 |
|               | Stage 2 vs Stage 4     | 2.215400E-01 |
|               | Stage 3 vs Stage 4     | 7.597800E-01 |
| hsa-miR-128   | Stage 1 vs Stage 2,3&4 | N/A          |
|               | Stage 2 vs Stage 3     | 6.593800E-01 |
|               | Stage 2 vs Stage 4     | 1.600640E-01 |
|               | Stage 3 vs Stage 4     | 9.919900E-02 |
| hsa-miR-1978  | Stage 1 vs Stage 2,3&4 | N/A          |
|               | Stage 2 vs Stage 3     | N/A          |
|               | Stage 2 vs Stage 4     | N/A          |
|               | Stage 3 vs Stage 4     | N/A          |
| hsa-miR-323a  | Stage 1 vs Stage 2,3&4 | N/A          |
|               | Stage 2 vs Stage 3     | 6.543400E-01 |
|               | Stage 2 vs Stage 4     | 4.080600E-01 |
|               | Stage 3 vs Stage 4     | 1.367940E-02 |
| hsa-miR-1237  | Stage 1 vs Stage 2,3&4 | N/A          |
|               | Stage 2 vs Stage 3     | 4.797800E-01 |
|               | Stage 2 vs Stage 4     | 4.962600E-01 |
|               | Stage 3 vs Stage 4     | 9.581400E-01 |
| hsa-miR-486   | Stage 1 vs Stage 2,3&4 | N/A          |
|               | Stage 2 vs Stage 3     | 4.861000E-01 |

|             |                        |              |
|-------------|------------------------|--------------|
|             | Stage 2 vs Stage 4     | 2.439200E-01 |
|             | Stage 3 vs Stage 4     | 4.852600E-01 |
|             | Stage 1 vs Stage 2,3&4 | N/A          |
| hsa-miR-98  | Stage 2 vs Stage 3     | 2.358600E-01 |
|             | Stage 2 vs Stage 4     | 4.671800E-01 |
|             | Stage 3 vs Stage 4     | 3.117600E-01 |
|             | Stage 1 vs Stage 2,3&4 | N/A          |
| hsa-miR-933 | Stage 2 vs Stage 3     | 5.775000E-01 |
|             | Stage 2 vs Stage 4     | 7.479000E-01 |
|             | Stage 3 vs Stage 4     | N/A          |
|             | Stage 1 vs Stage 2,3&4 | N/A          |
| hsa-miR-889 | Stage 2 vs Stage 3     | 4.949600E-01 |
|             | Stage 2 vs Stage 4     | 2.817400E-01 |
|             | Stage 3 vs Stage 4     | 6.191800E-02 |

**Supplementary Table 6. Top 10 ranked miRNAs and experimentally validated evidences across various cancer types.**

| Rank | miRNA        | Cancer type                                                                  | Source   |
|------|--------------|------------------------------------------------------------------------------|----------|
| 1    | hsa-miR-19b  | ovarian cancer<br>breast cancer<br>lung cancer                               | [1–3]    |
| 2    | hsa-let-7f   | ovarian cancer<br>glioma                                                     | [4–6]    |
| 3    | hsa-miR-323  | Breast cancer<br>ovarian cancer<br>prostate cancer                           | [7–9]    |
| 4    | hsa-miR-1978 | glioblastoma<br>endometriosis<br>Breast cancer                               | [10, 11] |
| 5    | hsa-miR-128  | ovarian cancer<br>colorectal cancer                                          | [12–14]  |
| 6    | hsa-miR-1237 | Gastric cancer<br>Gastric cancer                                             | [15]     |
| 7    | hsa-miR-486  | ovarian cancer<br>oral cancer                                                | [16–18]  |
| 8    | hsa-miR-98   | gastric Adenocarcinoma<br>ovarian cancer<br>pancreatic ductal adenocarcinoma | [19, 20] |
| 9    | hsa-miR-933  | Breast cancer                                                                | [21]     |
| 10   | hsa-miR-889  | cervical cancer<br>colorectal cancer                                         | [22, 23] |

**Supplementary Table 7. Prediction list of the identified miRNA signature associated with ovarian cancer based on known associations in dbDEMOC 2.0 and HMDD v3.0 databases.**

| Rank | MiRNA        | Cancer type    | Expression status | Experiment ID | LogFC |
|------|--------------|----------------|-------------------|---------------|-------|
| 1    | hsa-miR-19b  | ovarian cancer | up                | EXP00327      | 0.20  |
| 2    | hsa-let-7f   | ovarian cancer | down              | EXP00259      | -0.93 |
| 3    | hsa-miR-323  | -              | -                 | -             | -     |
| 4    | hsa-miR-1978 | -              | -                 | -             | -     |
| 5    | hsa-miR-128  | ovarian cancer | up                | EXP00260      | 1.44  |
| 6    | hsa-miR-1237 | ovarian cancer | up                | EXP00327      | 0.48  |
| 7    | hsa-miR-486  | ovarian cancer | up                | -             | -     |
| 8    | hsa-miR-98   | ovarian cancer | down              | EXP00259      | -1.07 |
| 9    | hsa-miR-933  | -              | -                 | -             | -     |
| 10   | hsa-miR-889  | ovarian cancer | down              | EXP00327      | -0.41 |
| 11   | hsa-miR-301b | ovarian cancer | up                | EXP00301      | 1.98  |
| 12   | hsa-miR-514  | ovarian cancer | down              | EXP00327      | -0.25 |
| 13   | hsa-miR-935  | ovarian cancer | up                | EXP00260      | 0.86  |
| 14   | hsa-miR-653  | ovarian cancer | down              | EXP00260      | -0.21 |
| 15   | hsa-miR-1251 | ovarian cancer | down              | EXP00301      | -2.78 |
| 16   | hsa-miR-616  | -              | -                 | -             | -     |
| 17   | hsa-miR-662  | ovarian cancer | up                | EXP00327      | 0.49  |
| 18   | hsa-miR-182  | ovarian cancer | up                | EXP00259      | 5.23  |
| 19   | hsa-miR-1245 | -              | -                 | -             | -     |
| 20   | hsa-miR-200c | ovarian cancer | up                | EXP00260      | 4.13  |
| 21   | hsa-miR-34a  | ovarian cancer | down              | EXP00260      | -0.16 |
| 22   | hsa-miR-187  | ovarian cancer | up                | EXP00260      | 3.92  |
| 23   | hsa-miR-190  | -              | -                 | -             | -     |
| 24   | hsa-miR-342  | -              | -                 | -             | -     |
| 25   | hsa-miR-513a | -              | -                 | -             | -     |
| 26   | hsa-miR-146b | ovarian cancer | up                | 29518404      | -     |
| 27   | hsa-miR-1197 | ovarian cancer | down              | EXP00327      | -0.24 |
| 28   | hsa-miR-577  | -              | -                 | -             | -     |
| 29   | hsa-miR-185  | ovarian cancer | down              | 23318422      | -     |
| 30   | hsa-miR-212  | ovarian cancer | down              | EXP00260      | -1.71 |
| 31   | hsa-miR-874  | ovarian cancer | down              | EXP00260      | -2.11 |
| 32   | hsa-miR-1304 | ovarian cancer | up                | EXP00327      | 0.25  |
| 33   | hsa-miR-106b | ovarian cancer | up                | EXP00260      | 1.55  |
| 34   | hsa-miR-31   | ovarian cancer | up                | EXP00327      | 0.26  |
| 35   | hsa-miR-320d | ovarian cancer | down              | EXP00259      | -0.81 |
| 36   | hsa-miR-1295 | -              | -                 | -             | -     |
| 37   | hsa-miR-664  | ovarian cancer | up                | EXP00260      | 1.09  |
| 38   | hsa-let-7b   | ovarian cancer | down              | EXP00327      | -0.29 |
| 39   | hsa-miR-24   | ovarian cancer | up                | EXP00260      | 0.55  |

**Supplementary Table 8. Clinical information of independent test cohort.**

|                                  |                           |     |
|----------------------------------|---------------------------|-----|
| Race                             | Asian                     | 11  |
|                                  | black or african american | 5   |
|                                  | NA                        | 8   |
|                                  | White                     | 136 |
| Age in years (average)           | 56.76                     |     |
| Cancer stage                     | Stage I                   | 1   |
|                                  | Stage II                  | 10  |
|                                  | Stage III                 | 127 |
|                                  | Stage IV                  | 22  |
| Ethnicity                        | hispanic or latino        | 3   |
|                                  | Not hispanic or latino    | 101 |
|                                  | NA                        | 56  |
| Follow-up time in days (average) | 454.27                    |     |

## REFERENCES

- Liu M, Yang R, Urrehman U, Ye C, Yan X, Cui S, Hong Y, Gu Y, Liu Y, Zhao C, Yan L, Zhang CY, Liang H, Chen X. MiR-19b suppresses PTPRG to promote breast tumorigenesis. *Oncotarget*. 2016; 7:64100–08. <https://doi.org/10.18632/oncotarget.11799> PMID:27602768
- Penyige A, Márton É, Soltész B, Szilágyi-Bónizs M, Póka R, Lukács J, Széles L, Nagy B. Circulating miRNA Profiling in Plasma Samples of Ovarian Cancer Patients. *Int J Mol Sci*. 2019; 20:4533. <https://doi.org/10.3390/ijms20184533> PMID:31540229
- Bulgakova O, Zhabayeva D, Kussainova A, Pulliero A, Izzotti A, Bersimbaev R. miR-19 in blood plasma reflects lung cancer occurrence but is not specifically associated with radon exposure. *Oncol Lett*. 2018; 15:8816–24. <https://doi.org/10.3892/ol.2018.8392> PMID:29805621
- White NM, Chow TF, Mejia-Guerrero S, Diamandis M, Rofael Y, Faragalla H, Mankaruous M, Gabril M, Girgis A, Yousef GM. Three dysregulated miRNAs control kallikrein 10 expression and cell proliferation in ovarian cancer. *Br J Cancer*. 2010; 102:1244–53. <https://doi.org/10.1038/sj.bjc.6605634> PMID:20354523
- Yan S, Han X, Xue H, Zhang P, Guo X, Li T, Guo X, Yuan G, Deng L, Li G. Let-7f Inhibits Glioma Cell Proliferation, Migration, and Invasion by Targeting Periostin. *J Cell Biochem*. 2015; 116:1680–92. <https://doi.org/10.1002/jcb.25128> PMID:25735962
- Elghoroury EA, Eldine HG, Kamel SA, Abdelrahman AH, Mohammed A, Kamel MM, Ibrahim MH. Evaluation of miRNA-21 and miRNA Let-7 as Prognostic Markers in Patients With Breast Cancer. *Clin Breast Cancer*. 2018; 18:e721–26. <https://doi.org/10.1016/j.clbc.2017.11.022> PMID:29292183
- Vaksman O, Tropé C, Davidson B, Reich R. Exosome-derived miRNAs and ovarian carcinoma progression. *Carcinogenesis*. 2014; 35:2113–20. <https://doi.org/10.1093/carcin/bgu130> PMID:24925027
- Gao Q, Yao X, Zheng J. MiR-323 Inhibits Prostate Cancer Vascularization Through Adiponectin Receptor. *Cell Physiol Biochem*. 2015; 36:1491–98. <https://doi.org/10.1159/000430313> PMID:26160610
- Shahar T, Granit A, Zrihan D, Canello T, Charbit H, Einstein O, Rozovski U, Elgavish S, Ram Z, Siegal T, Lavon I. Expression level of miRNAs on chromosome 14q32.31 region correlates with tumor aggressiveness and survival of glioblastoma patients. *J Neurooncol*. 2016; 130:413–22. <https://doi.org/10.1007/s11060-016-2248-0> PMID:27573219
- Suryawanshi S, Vlad AM, Lin HM, Mantia-Smaldone G, Laskey R, Lee M, Lin Y, Donnellan N, Klein-Patel M, Lee T, Mansuria S, Elishaev E, Budiu R, et al. Plasma microRNAs as novel biomarkers for endometriosis and endometriosis-associated ovarian cancer. *Clin Cancer Res*. 2013; 19:1213–24. <https://doi.org/10.1158/1078-0432.CCR-12-2726> PMID:23362326
- Fix LN, Shah M, Efferth T, Farwell MA, Zhang B. MicroRNA expression profile of MCF-7 human breast



- cancer cells and the effect of green tea polyphenon-60. *Cancer Genomics Proteomics*. 2010; 7:261–77.  
PMID:[20952761](https://pubmed.ncbi.nlm.nih.gov/20952761/)
12. Li B, Chen H, Wu N, Zhang WJ, Shang LX. Deregulation of miR-128 in ovarian cancer promotes cisplatin resistance. *Int J Gynecol Cancer*. 2014; 24:1381–88.  
<https://doi.org/10.1097/IGC.0000000000000252>  
PMID:[25248111](https://pubmed.ncbi.nlm.nih.gov/25248111/)
  13. Wu L, Shi B, Huang K, Fan G. MicroRNA-128 suppresses cell growth and metastasis in colorectal carcinoma by targeting IRS1. *Oncol Rep*. 2015; 34:2797–805.  
<https://doi.org/10.3892/or.2015.4251> PMID:[26352220](https://pubmed.ncbi.nlm.nih.gov/26352220/)
  14. Liu HT, Xing AY, Chen X, Ma RR, Wang YW, Shi DB, Zhang H, Li P, Chen HF, Li YH, Gao P. MicroRNA-27b, microRNA-101 and microRNA-128 inhibit angiogenesis by down-regulating vascular endothelial growth factor C expression in gastric cancers. *Oncotarget*. 2015; 6:37458–70.  
<https://doi.org/10.18632/oncotarget.6059>  
PMID:[26460960](https://pubmed.ncbi.nlm.nih.gov/26460960/)
  15. Liu J, Ma L, Wang Z, Wang L, Liu C, Chen R, Zhang J. MicroRNA expression profile of gastric cancer stem cells in the MKN-45 cancer cell line. *Acta Biochim Biophys Sin (Shanghai)*. 2014; 46:92–99.  
<https://doi.org/10.1093/abbs/gmt135> PMID:[24384510](https://pubmed.ncbi.nlm.nih.gov/24384510/)
  16. Nakamura N, Terai Y, Nunode M, Kokunai K, Konishi H, Taga S, Nakamura M, Yoo M, Hayashi M, Yamashita Y, Ohmichi M. The differential expression of miRNAs between ovarian endometrioma and endometriosis-associated ovarian cancer. *J Ovarian Res*. 2020; 13:51.  
<https://doi.org/10.1186/s13048-020-00652-5>  
PMID:[32359364](https://pubmed.ncbi.nlm.nih.gov/32359364/)
  17. Chou ST, Peng HY, Mo KC, Hsu YM, Wu GH, Hsiao JR, Lin SF, Wang HD, Shiah SG. MicroRNA-486-3p functions as a tumor suppressor in oral cancer by targeting DDR1. *J Exp Clin Cancer Res*. 2019; 38:281.  
<https://doi.org/10.1186/s13046-019-1283-z>  
PMID:[31253192](https://pubmed.ncbi.nlm.nih.gov/31253192/)
  18. Chen H, Ren C, Han C, Wang D, Chen Y, Fu D. Expression and prognostic value of miR-486-5p in patients with gastric adenocarcinoma. *PLoS One*. 2015; 10:e0119384.  
<https://doi.org/10.1371/journal.pone.0119384>  
PMID:[25793394](https://pubmed.ncbi.nlm.nih.gov/25793394/)
  19. Wang Y, Bao W, Liu Y, Wang S, Xu S, Li X, Li Y, Wu S. miR-98-5p contributes to cisplatin resistance in epithelial ovarian cancer by suppressing miR-152 biogenesis via targeting Dicer1. *Cell Death Dis*. 2018; 9:447.  
<https://doi.org/10.1038/s41419-018-0390-7>  
PMID:[29670086](https://pubmed.ncbi.nlm.nih.gov/29670086/)
  20. Fu Y, Liu X, Chen Q, Liu T, Lu C, Yu J, Miao Y, Wei J. Downregulated miR-98-5p promotes PDAC proliferation and metastasis by reversely regulating MAP4K4. *J Exp Clin Cancer Res*. 2018; 37:130.  
<https://doi.org/10.1186/s13046-018-0807-2>  
PMID:[29970191](https://pubmed.ncbi.nlm.nih.gov/29970191/)
  21. Tanman Ü, Yangin S, Cansaran-Duman D. Determination of Dysregulated miRNA Expression Levels by qRT-PCR after the Application of Usnic Acid to Breast Cancer. *Anticancer Agents Med Chem*. 2020; 20:548–58.  
<https://doi.org/10.2174/1871520619666190923163552> PMID:[31549595](https://pubmed.ncbi.nlm.nih.gov/31549595/)
  22. Sun Y, Cheng Y, Zhang Y, Han K. MicroRNA-889-3p targets FGFR2 to inhibit cervical cancer cell viability and invasion. *Exp Ther Med*. 2019; 18:1440–48.  
<https://doi.org/10.3892/etm.2019.7675>  
PMID:[31316631](https://pubmed.ncbi.nlm.nih.gov/31316631/)
  23. Xiao Y, Li ZH, Bi YH. MicroRNA-889 promotes cell proliferation in colorectal cancer by targeting DAB2IP. *Eur Rev Med Pharmacol Sci*. 2019; 23:3326–34.  
[https://doi.org/10.26355/eurev\\_201904\\_17695](https://doi.org/10.26355/eurev_201904_17695)  
PMID:[31081086](https://pubmed.ncbi.nlm.nih.gov/31081086/)
